# Supplementary material for: Rational design of anti-freezing electrolyte concentrations via freeze concentration process
Source: Royal Society of Chemistry journal article supplement (doi:10.1039/d4ee00859f), 2024-01-01
Supplement: d4ee00859f1.pdf [file d4ee00859f1.pdf]

## Supporting information for

### **Rational design of anti-freezing electrolyte concentrations via freeze concentration process**

Liwei Jiang<sup>1</sup>, Yuan-Chao Hu<sup>2</sup>, Fei Ai<sup>1</sup>, Zhuojian Liang<sup>1</sup>, Yi-Chun Lu<sup>1\*</sup>

1 Electrochemical Energy and Interfaces Laboratory, Department of Mechanical and Automation Engineering, The Chinese University of Hong Kong, Hong Kong SAR, China

2 Songshan Lake Materials Laboratory, Dongguan 523808, China

\*Address correspondence to [yichunlu@mae.cuhk.edu.hk](mailto:yichunlu@mae.cuhk.edu.hk)

**This file includes:**

Experimental and Computational Methods

Figs. S1 to S13

Tables S1 to S14

References 1-23

## Methods

**Material fabrication.** The  $\text{LiMn}_2\text{O}_4$  cathode and PTCDI anode are purchased from MTI and Alfa Aesar corporations, respectively. The NaCoHCF cathode was prepared by a simple precipitation approach according to the literature<sup>1</sup>. The cathode (anode) composite electrodes were fabricated by compressing cathode (anode), carbon black, and polytetrafluoroethylene (PTFE) at weight ratio of 7:2:1 (6:3:1). The Ti mesh is used as the electrode current collector. The 3.85 m  $\text{NaClO}_4$  + 5.92 m  $\text{NaCF}_3\text{COO}$  electrolyte is obtained by dissolving 3.85 mmol  $\text{NaClO}_4$  and 5.92 mmol  $\text{NaCF}_3\text{COO}$  into 1 g  $\text{H}_2\text{O}$ . The  $\text{H}_{36}\text{EG}_{64}$ -0.5 m  $\text{NaClO}_4$  electrolyte is obtained by dissolving 0.5 mmol  $\text{NaClO}_4$  into 0.36 g  $\text{H}_2\text{O}$  and 0.64 g ethylene glycol (EG).

**Syringe-filtration method in FCE approach.** In the syringe-filtration method, the dilute solution of single-solute (such as the  $\text{H}_2\text{O}$ -LiCl or  $\text{H}_2\text{O}$ - $\text{NaClO}_4$ ) system is usually kept in the chamber at  $T_i$  for several hours or longer time before the FCE is filtered (**Fig. S2a, ESI†**). For the multiple-solute  $\text{H}_2\text{O}$ - $\text{NaClO}_4$ - $\text{NaCF}_3\text{COO}$  and  $\text{LiPF}_6$ -EC-DEC system, the dilute solution is first frozen in liquid nitrogen (**Fig. S2b, ESI†**) to eliminate the supercooling during hydrate precipitation, followed by the same procedure as in above single-solute system. The equilibrium of FCEs in  $\text{H}_2\text{O}$ -LiCl,  $\text{H}_2\text{O}$ - $\text{NaClO}_4$ ,  $\text{H}_2\text{O}$ - $\text{NaClO}_4$ - $\text{NaCF}_3\text{COO}$ , and  $\text{LiPF}_6$ -EC-DEC systems can be reached after keeping dilute solution at  $T_i$  for 2 hours, 3 hours, 6 hours, and 24 hours, respectively, because the refractive index of obtained FCE does not change even after keeping the dilute solution at  $T_i$  for longer time. Here, the dilute solution is the one that has a concentration less than eutectic-point concentration  $X_e$  and will precipitate ice or hydrate at  $T_i$ . In the single-solute system, the electrolyte refractive index usually increases as the concentration increases. Therefore, one can identify the preselected solution as a dilute solution when the refractive index of FCE obtained at  $T_i$  is higher than that of preselected solution. The FCE concentrations in  $\text{H}_2\text{O}$ -LiCl and  $\text{H}_2\text{O}$ - $\text{NaClO}_4$  systems were determined by the refractive index method<sup>2</sup> (**Figs. S2c-d, ESI†**). The FCE concentrations in  $\text{H}_2\text{O}$ - $\text{NaClO}_4$ - $\text{NaCF}_3\text{COO}$  system were determined by the inductively coupled plasma atomic emission spectrometry<sup>3</sup> (to determine the concentration of  $\text{Na}^+$ ) and ion chromatography (to determine the concentration of  $\text{ClO}_4^-$ )<sup>4, 5</sup>. The FCE concentration in  $\text{LiPF}_6$ -EC-DEC system was determined by ICP test (for  $\text{Li}^+$ ) and organic elemental analyzer vario EL cube (for carbon mass ratio).

**Electrochemical measurements.** The three-electrode cell consists of cathode (anode) composite working electrode, active carbon counter electrode, and Ag/AgCl-7.18 m LiCl (0.205 V vs. standard hydrogen electrode), with the mass ratio of counter electrode to working electrode being around 8-10. Swagelok-type cells were used to assemble the Li-based full cell, with Ti foil used to protect against halogen corrosion. Coin cells were used to assemble the Na-based full cell. The mass loadings of cathode and anode in Li-based Swagelok-type cells are  $6.3 \text{ mg cm}^{-2}$  and  $7.2 \text{ mg cm}^{-2}$  respectively. The mass loadings of cathode and anode in Na-based coin cells are  $5.4 \text{ mg cm}^{-2}$  and  $7.6 \text{ mg cm}^{-2}$  respectively. The amount of electrolyte in Li-based Swagelok-type cell and Na-based coin cell was 0.2 mL. The mass loading of cathode and anode in Li-based pouch cell are  $13.3 \text{ mg cm}^{-2}$  and  $15.2 \text{ mg cm}^{-2}$  respectively. The mass loading of cathode and anode in Na-based pouch cell are  $11.4 \text{ mg cm}^{-2}$  and  $14.6 \text{ mg cm}^{-2}$  respectively. The amount of electrolyte in Li-based and Na-based pouch cells were 1.0 mL. The charge-discharge tests of cells were performed on the Landt battery test systems (CT3001A, Wuhan Land Electronic Co., Ltd.) and Neware battery test systems (CT-4008-5V50mA-164, Neware technology limited). The full cell specific capacities are showed based on cathode mass and all the current rates are calculated based on a theoretical capacity of  $120 \text{ mAh g}^{-1}$  in both Li- and Na-based cells. The mass ratio of cathode/anode is 1/0.9 for both Li-based and Na-based full cells. The energy densities of full cells are calculated based on total active material mass of cathode and anode. For low-temperature tests, the cell performance was measured in a ShangHai BoYi B-T-107D oven.

**Characterization.** The refractive index was measured by the Abbe refractometer (WAY-2WAJ) with high accuracy ( $\pm 0.0002$ ). The ionic conductivities of the electrolytes were measured by electrochemical impedance spectroscopy (EIS) using BioLogic. The chemical formula ( $\text{Na}_{1.4}\text{Co}[\text{Fe}(\text{CN})_6]_{0.84} \cdot 2.5\text{H}_2\text{O}$ ) of NaCoHCF cathode was determined by inductively coupled plasma atomic emission spectrometry. The Raman spectra for electrolytes were conducted on HORIBA HR evolution microscope using a 532 nm excitation laser. The Raman spectra of  $\text{H}_2\text{O}-\text{NaClO}_4$  system at  $-34.1 \text{ }^\circ\text{C}$  and  $\text{H}_2\text{O}-\text{NaClO}_4-\text{NaCF}_3\text{COO}$  system at  $-50 \text{ }^\circ\text{C}$  were tested after experiencing a cooling process from  $25 \text{ }^\circ\text{C}$  to  $-150 \text{ }^\circ\text{C}$ . DSC tests were carried out in DSC200F3 with cooling and heating rates of  $10 \text{ K min}^{-1}$  from  $25 \text{ }^\circ\text{C}$  to  $-150 \text{ }^\circ\text{C}$ . The linear sweep voltammetry (LSV) is tested at scan rate of  $10 \text{ mV s}^{-1}$  using BioLogic.

**AIMD simulations.** The AIMD simulations were carried out by using the Vienna ab initio simulation package (VASP)<sup>6</sup>. The projector augmented-wave (PAW) potentials<sup>7</sup> generated with Perdew–Burke–Ernzerhof (PBE) generalized gradient approximation (GGA)<sup>8</sup>were used. The van der Waals (vdW) interaction was taken into account by using the rev-vdWDF2 functional<sup>9</sup>. The plane wave cut-off energy was set to 400 eV and the  $\Gamma$  point was used for the Brillouin zone sampling. The AIMD simulations were performed in a canonical ensemble (NVT)<sup>10, 11</sup> by using a Nose-Hoover thermostat at 300 K (H<sub>2</sub>O, 7.18 m LiCl, 9.07 m NaClO<sub>4</sub>, 3.85 m NaClO<sub>4</sub> + 5.92 m NaCF<sub>3</sub>COO), with a time step of 1 fs. All the AIMD simulations were run for 60-100 ps to yield the data for analysis. The H<sub>2</sub>O AIMD model contains 165 atoms (55 H<sub>2</sub>O) within 11.8 Å x 11.8 Å x 11.8 Å cubic supercell. The 7.18 m LiCl electrolyte AIMD model contains 181 atoms (8 LiCl and 55 H<sub>2</sub>O) within 12.5 Å x 12.5 Å x 12.5 Å cubic supercell. The 9.07 m NaClO<sub>4</sub> electrolyte AIMD model contains 96 atoms (4 NaClO<sub>4</sub> and 24 H<sub>2</sub>O) within 10.5 Å x 10.5 Å x 10.5 Å cubic supercell. The 3.85 m NaClO<sub>4</sub> + 5.92 m NaCF<sub>3</sub>COO electrolyte AIMD model contains 117 atoms (2 NaClO<sub>4</sub>, 3 NaCF<sub>3</sub>COO, and 27 H<sub>2</sub>O) within 11.5 Å x 11.5 Å x 11.5 Å cubic supercell. The initial structures of liquid electrolyte models were constructed using the Packmol software<sup>12</sup>.

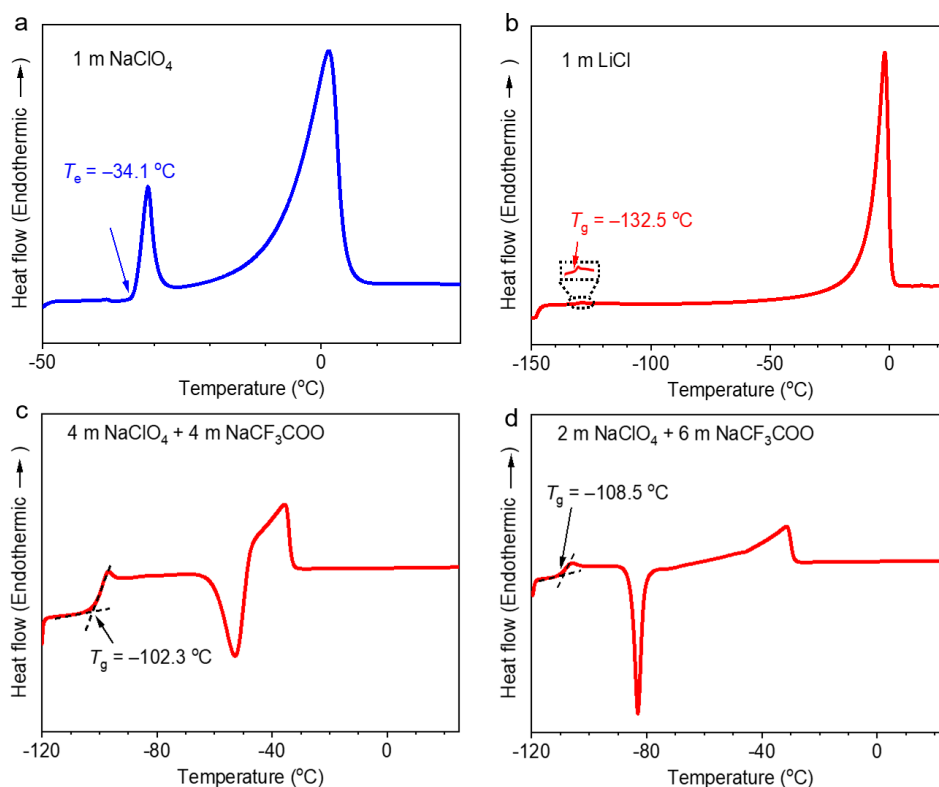

**Fig. S1. Determine the liquid-to-solid low-temperature limits of H<sub>2</sub>O-solute systems by DSC heating curves of dilute solutions. (a)** The DSC heating curve of 1 m NaClO<sub>4</sub> electrolyte in H<sub>2</sub>O-NaClO<sub>4</sub> system. The eutectic heat-flow peak on the DSC curve demonstrates that the thermodynamic liquid-to-solid low-temperature limit  $T_e$  of the H<sub>2</sub>O-NaClO<sub>4</sub> system is  $-34.1$  °C.  $T_e$  is usually determined by the onset temperature of  $T_e$  peak<sup>13</sup>. **(b)** The DSC heating curve of 1 m LiCl electrolyte in H<sub>2</sub>O-LiCl system. The DSC curve shows the glass-transition step (see the enlarged picture in the dotted rectangle) rather than the eutectic heat-flow peak, demonstrating that the DSC test can only determine the kinetic liquid-to-solid low-temperature limit  $T_g$  ( $-132.5$  °C) rather than the  $T_e$  value of H<sub>2</sub>O-LiCl system.  $T_g$  is usually determined by the onset temperature of  $T_g$  peak<sup>14</sup>. **(c-d)** The DSC heating curves of 4 m NaClO<sub>4</sub> + 4 m NaCF<sub>3</sub>COO ( $T_g = -102.3$  °C) **(c)** and 2 m NaClO<sub>4</sub> + 6 m NaCF<sub>3</sub>COO ( $T_g = -108.5$  °C) **(d)** electrolytes in H<sub>2</sub>O-NaClO<sub>4</sub>-NaCF<sub>3</sub>COO system.

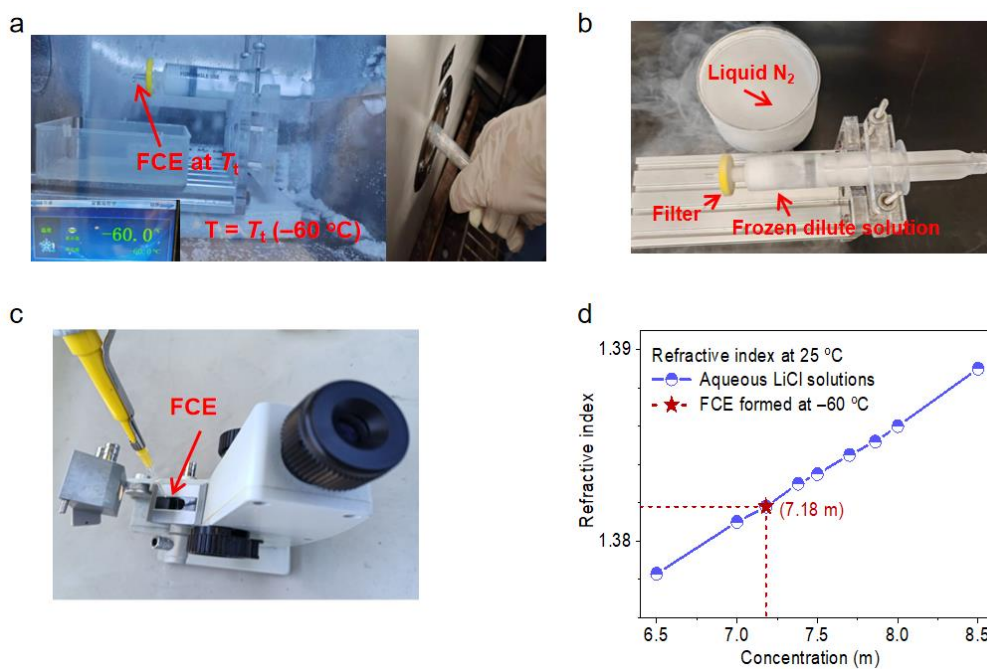

**Fig. S2. The syringe-filtration method for the FCE approach. (a)** keep the dilute solution in the chamber at  $T_t$  (e.g.  $-60^\circ\text{C}$ ) to reach chemical equilibrium before filtering the FCE by manually squeezing the syringe. **(b)** Illustration of a dilute solution of  $\text{H}_2\text{O}$ - $\text{NaClO}_4$ - $\text{NaCF}_3\text{COO}$  system being frozen in liquid  $\text{N}_2$ . **(c)** Measure the refractive index of FCE with the Abbe refractometer. **(d)** Determine the concentration of FCE obtained at  $-60^\circ\text{C}$  by the refractive index method.

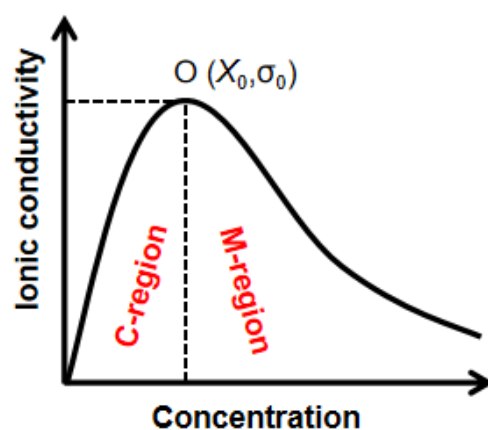

**Fig. S3. Typical concentration-conductivity curve in an H<sub>2</sub>O-solute system.** The point O ( $X_0, \sigma_0$ ) is the maximum conductivity point. The concentration-conductivity curve can be divided into two regions<sup>15, 16</sup>: concentration-controlled region (C-region) below concentration  $X_0$  and mobility-controlled region (M-region) above concentration  $X_0$ . The FCE obtained at ultralow  $T_f$  usually locate at the M-region and therefore has the lowest electrolyte concentration (therefore the lowest cost) and the highest ionic conductivity without being frozen at  $T_f$ .

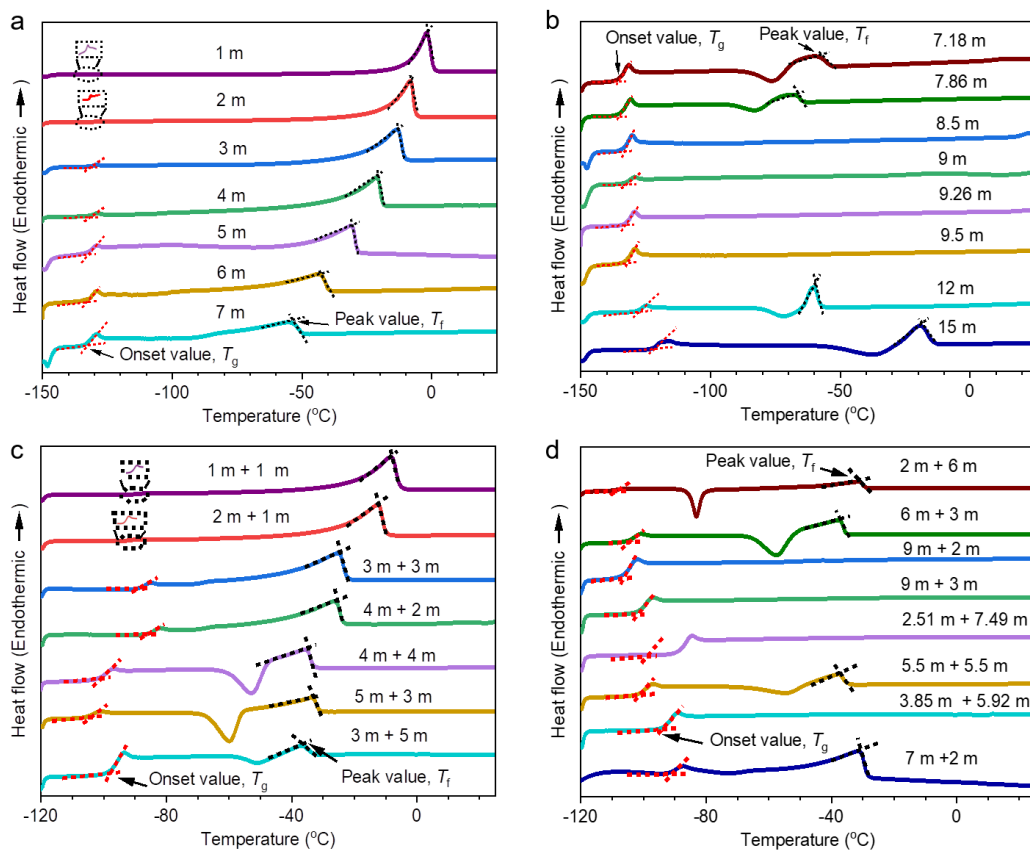

**Fig. S4.** The DSC heating curves of aqueous solutions in  $\text{H}_2\text{O-LiCl}$  and  $\text{H}_2\text{O-NaClO}_4\text{-NaCF}_3\text{COO}$  systems at heating rate of  $10 \text{ K min}^{-1}$ . **a-b**, 1 m to 15 m LiCl. **c-d**, Various electrolyte concentrations. The “1 m + 1 m” represents the “1 m  $\text{NaClO}_4$  + 1 m  $\text{NaCF}_3\text{COO}$ ”. See all the  $T_g$  and  $T_f$  values in **Tables S2 and S8**.



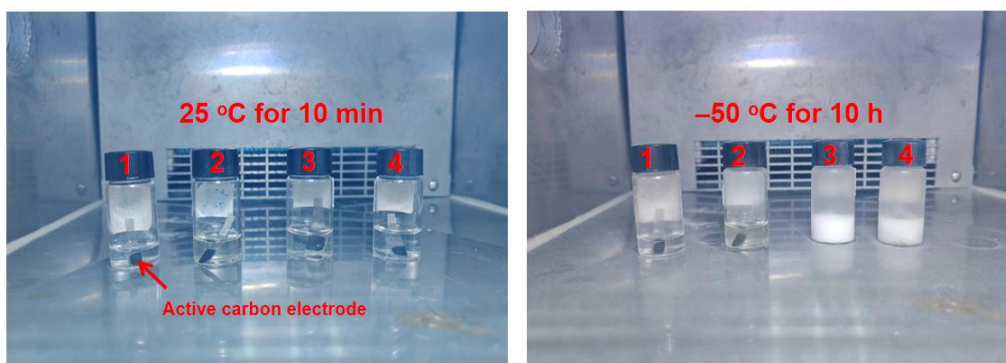

**Fig. S5. The photographs of various electrolytes in  $\text{H}_2\text{O}-\text{NaClO}_4-\text{NaCF}_3\text{COO}$  system at 25 °C (10 min) and -50 °C (10 h). The active carbon electrodes are used to inhibit supercooling phenomenon and promote electrolyte crystallization. No. 1: 3.85 m  $\text{NaClO}_4$  + 5.92 m  $\text{NaCF}_3\text{COO}$ , No. 2: 7.49 m  $\text{NaClO}_4$  + 2.51 m  $\text{NaCF}_3\text{COO}$ , No. 3: 9 m  $\text{NaClO}_4$  + 2 m  $\text{NaCF}_3\text{COO}$ , No. 4: 9 m  $\text{NaClO}_4$  + 3 m  $\text{NaCF}_3\text{COO}$ .**

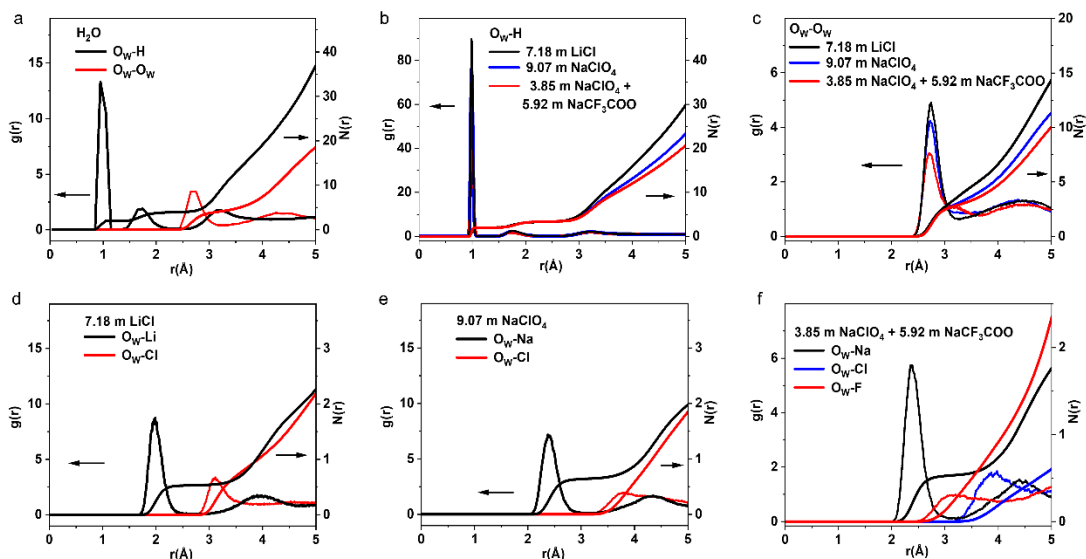

**Fig. S6.** The radial distribution function  $g(r)$  and coordination number  $N(r)$  for pure  $\text{H}_2\text{O}$ , 7.18 m LiCl, 9.07 m  $\text{NaClO}_4$ , 3.85 m  $\text{NaClO}_4$  + 5.92 m  $\text{NaCF}_3\text{COO}$  AIMD models. (a)  $\text{O}_w\text{-H}$  and  $\text{O}_w\text{-O}_w$  in pure  $\text{H}_2\text{O}$ . (b)  $\text{O}_w\text{-H}$  in the designed FCEs. (c)  $\text{O}_w\text{-O}_w$  in the designed FCEs. (d)  $\text{O}_w\text{-Li}$  and  $\text{O}_w\text{-Cl}$  in 7.18 m LiCl. (e)  $\text{O}_w\text{-Na}$  and  $\text{O}_w\text{-Cl}$  in 9.07 m  $\text{NaClO}_4$ . (f)  $\text{O}_w\text{-Na}$ ,  $\text{O}_w\text{-Cl}$ , and  $\text{O}_w\text{-F}$  in 3.85 m  $\text{NaClO}_4$  + 5.92 m  $\text{NaCF}_3\text{COO}$ .  $\text{O}_w$ : oxygen atom in  $\text{H}_2\text{O}$ .

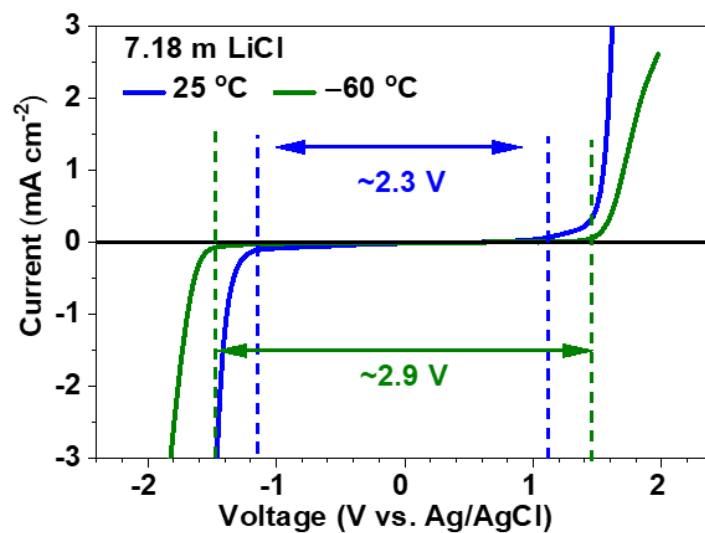

**Fig. S7.** The linear sweep voltammetry (Scan rate: 10 mV s<sup>-1</sup>) of 7.18 m LiCl electrolyte at 25 °C and -60 °C.

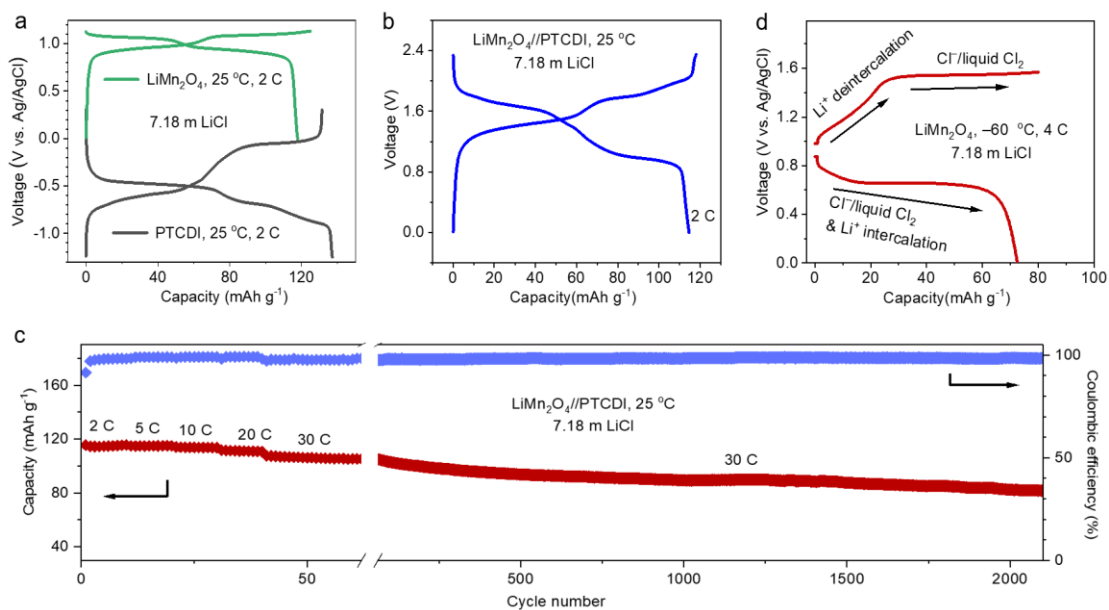

**Fig. S8. Performances of Li-based electrodes and cells in 7.18 m LiCl electrolyte. (a-b),** Typical charge-discharge curves of  $\text{LiMn}_2\text{O}_4$  cathode (a), PTCDI anode (a), and  $\text{LiMn}_2\text{O}_4$ //PTCDI full cell (b) at 25 °C. (c) Rate capability and cycling stability of  $\text{LiMn}_2\text{O}_4$ //PTCDI full cell at 25 °C. (d) Typical charge-discharge curve of  $\text{LiMn}_2\text{O}_4$  cathode at -60 °C. The reversible capacity at -60 °C is contributed by  $\text{Li}^+$ -(de)intercalation mechanism and  $\text{Cl}^-/\text{liquid Cl}_2$  redox mechanism.

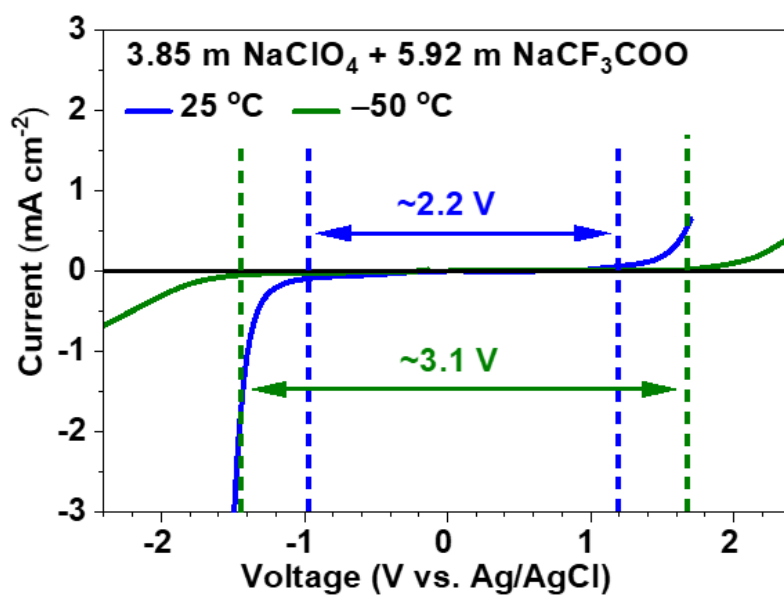

Fig. S9. The linear sweep voltammetry (Scan rate: 10 mV s<sup>-1</sup>) of 3.85 m NaClO<sub>4</sub> + 5.92 m NaCF<sub>3</sub>COO electrolyte at 25 °C and -50 °C.

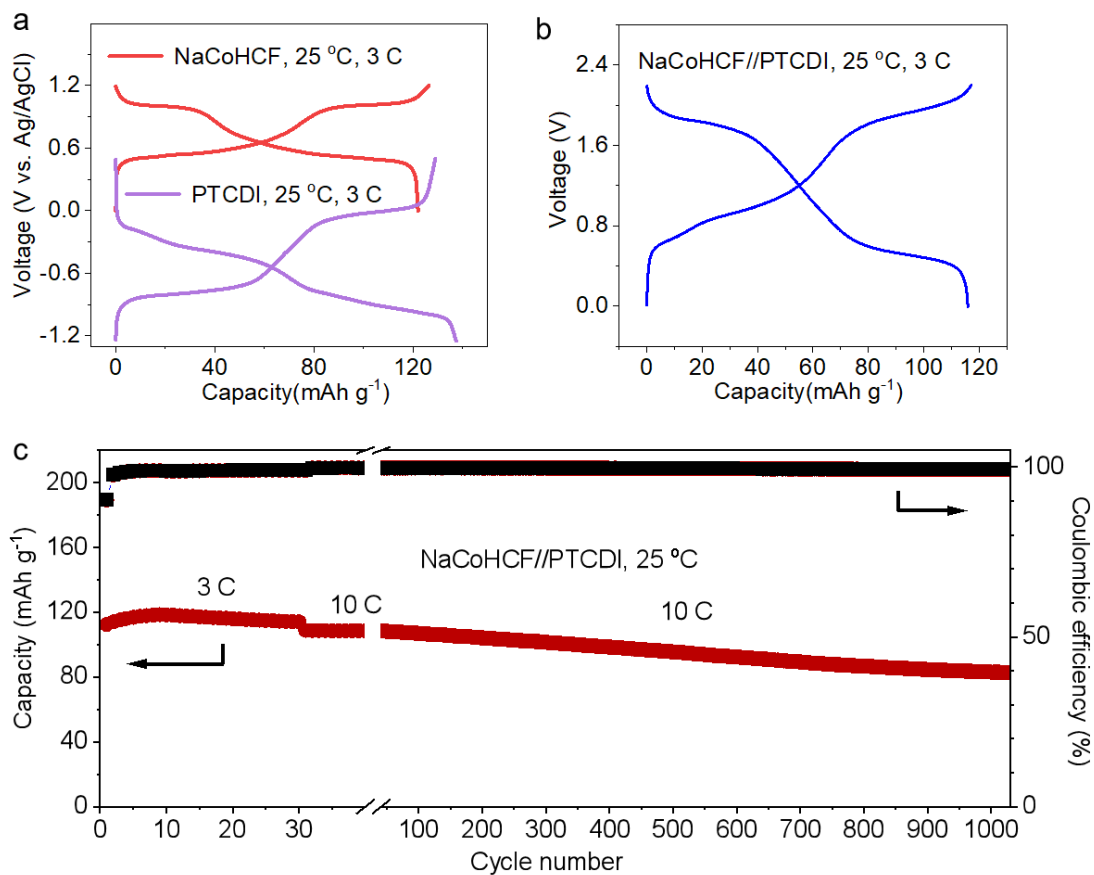

**Fig. S10.** Performances of Na-based electrodes and cells in 3.85 m NaClO<sub>4</sub> + 5.92 m NaCF<sub>3</sub>COO electrolyte. **(a-b)** Typical charge-discharge curves of NaCoHCF cathode **(a)**, PTCDI anode **(a)**, and NaCoHCF//PTCDI full cell **(b)** at 25 °C. **(c)** Rate capability and cycling stability of NaCoHCF//PTCDI full cell at 25 °C.

Freeze concentration at target low temperature

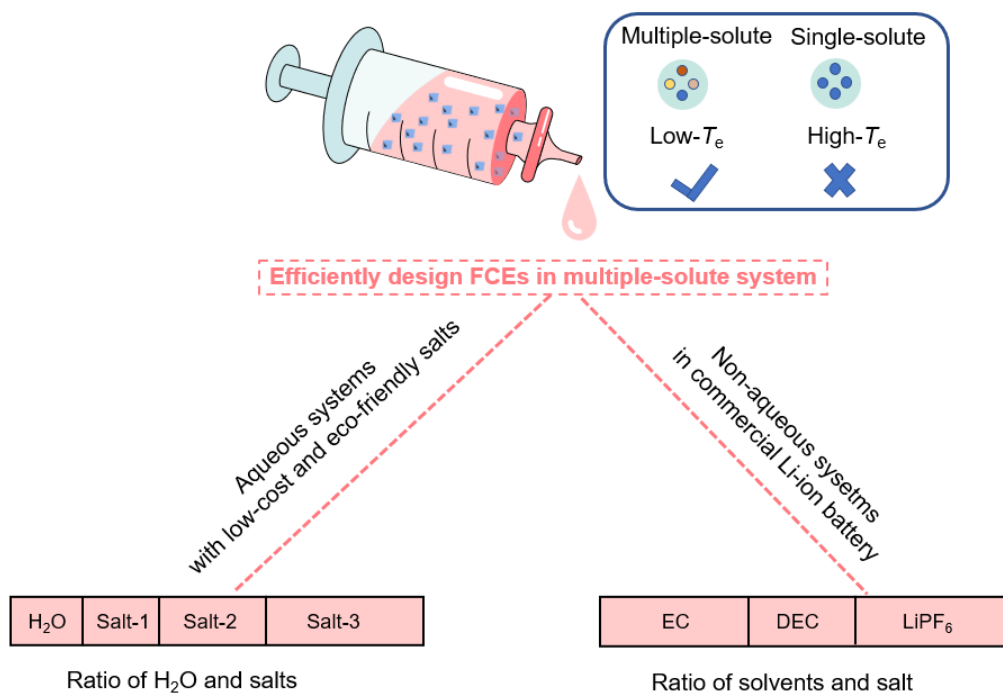

**Fig. S11. Future applications of the FCE approach in designing anti-freezing electrolytes.** EC: ethylene carbonate. DEC: dimethyl carbonate.

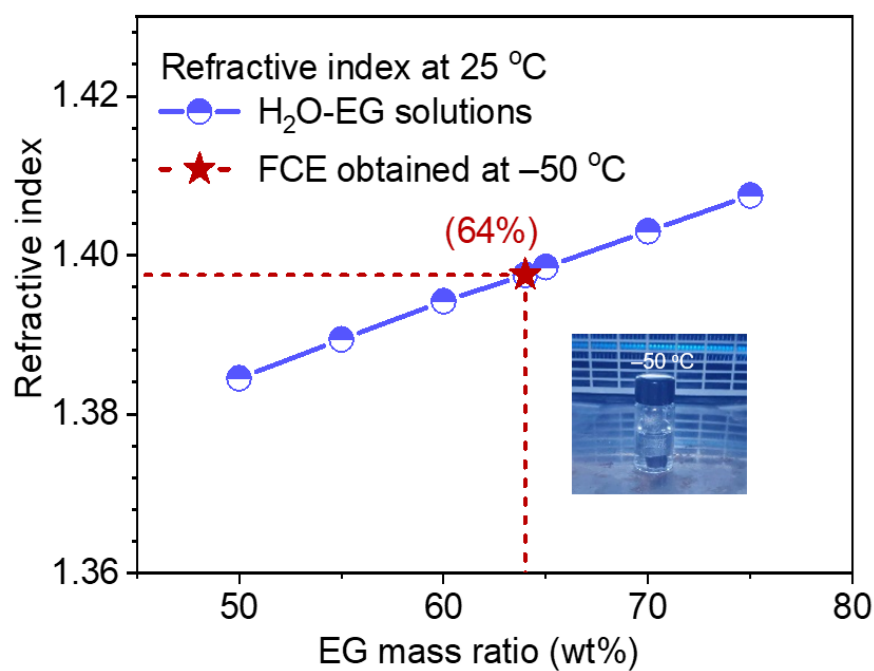

**Fig. S12. Design anti-freezing electrolyte in H<sub>2</sub>O-EG-NaClO<sub>4</sub> system using FCE approach when  $T_t$  is  $-50$  °C.** Here, we firstly determined the lowest EG amount (64 wt%) needed to keep unfrozen state in H<sub>2</sub>O-EG system, and then prepared the H<sub>36</sub>EG<sub>64</sub>-0.5 m NaClO<sub>4</sub> electrolyte. The electrolyte can maintain unfrozen state at  $-50$  °C, as shown in the inset photograph (The active carbon electrode is used to inhibit supercooling phenomenon and promote electrolyte crystallization).



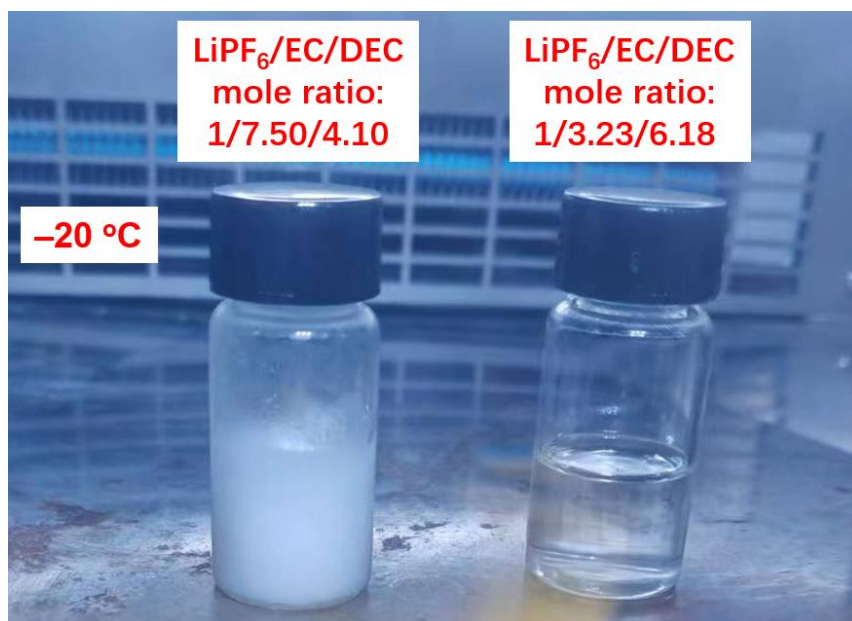

**Fig. S13.** The picture of dilute solution (left) and determined FCE (right) after keeping at  $-20\text{ }^{\circ}\text{C}$  for 24 h (firstly being frozen in liquid  $\text{N}_2$ ). The dilute solution is the typical commercial formula, 1M  $\text{LiPF}_6$  in EC-DEC (1:1, vol) (mole ratio of  $\text{LiPF}_6/\text{EC}/\text{DEC}$  is 1/7.50/4.10). The FCE component mole ratio  $\text{LiPF}_6/\text{EC}/\text{DEC}$  is determined as 1/3.23/6.18 (Table S14, ESI†).

**Table S1. The definition of the symbols in the main text.**

| Symbols                                                                 | Definition                                                           |
|-------------------------------------------------------------------------|----------------------------------------------------------------------|
| $T_f$                                                                   | Freezing point                                                       |
| $T_e$                                                                   | Eutectic temperature                                                 |
| $T_t$                                                                   | The target low temperature                                           |
| $T_g$                                                                   | Glass-transition temperature                                         |
| $T_D$                                                                   | Freezing point of dilute solution                                    |
| $X_e$                                                                   | Eutectic-point concentration                                         |
| $X_D$                                                                   | Concentration of dilute solution                                     |
| $X_F$                                                                   | Concentration of FCE                                                 |
| $X_{\text{salt-1}}, X_{\text{salt-2}},$<br>and $X_{\text{H}_2\text{O}}$ | Concentration percentages of FCE concentration<br>in ternary systems |

**Table S2. The  $T_g$  and  $T_f$  values of aqueous solutions in H<sub>2</sub>O-LiCl system based on the DSC data in Figs. S4a-b and the design efficiency in conventional approach.**

The “\*” means that the  $T_f$  values of these electrolytes cannot be determined by DSC curves owing to the lack of melting peaks, but their  $T_f$  are lower than  $-60$  °C according to the reported H<sub>2</sub>O-LiCl phase diagram<sup>17</sup>.

| Preselected concentration | $T_g$ determined by DSC | $T_f$ determined by DSC | Preselected numbers | Qualifying numbers | Design efficiency |
|---------------------------|-------------------------|-------------------------|---------------------|--------------------|-------------------|
| 1 m                       | $-132.5$ °C             | $-1.5$ °C               | 15                  | 5                  | 33.3%             |
| 2 m                       | $-132.5$ °C             | $-8.1$ °C               |                     |                    |                   |
| 3 m                       | $-132.5$ °C             | $-12.8$ °C              |                     |                    |                   |
| 4 m                       | $-132.5$ °C             | $-20.4$ °C              |                     |                    |                   |
| 5 m                       | $-132.6$ °C             | $-30.5$ °C              |                     |                    |                   |
| 6 m                       | $-132.4$ °C             | $-42.5$ °C              |                     |                    |                   |
| 7 m                       | $-132.5$ °C             | $-53.3$ °C              |                     |                    |                   |
| 7.18 m                    | $-135.3$ °C             | $-56.8$ °C              |                     |                    |                   |
| 7.86 m                    | $-134.5$ °C             | $-66.5$ °C              |                     |                    |                   |
| 8.5 m*                    | $-133.4$ °C             | \                       |                     |                    |                   |
| 9 m*                      | $-132.9$ °C             | \                       |                     |                    |                   |
| 9.26 m*                   | $-132.5$ °C             | \                       |                     |                    |                   |
| 9.5 m*                    | $-132.1$ °C             | \                       |                     |                    |                   |
| 12 m                      | $-128.5$ °C             | $-58.9$ °C              |                     |                    |                   |
| 15 m                      | $-121.3$ °C             | $-18.9$ °C              |                     |                    |                   |

**Table S3. The anti-freezing electrolyte design using FCE approach when  $T_t$  is set as  $-60\text{ }^\circ\text{C}$  in  $\text{H}_2\text{O-LiCl}$  system and the design efficiency in FCE approach.**

| <b>Preselected concentration</b> | <b>Refractive index of FCE at <math>25\text{ }^\circ\text{C}</math></b> | <b>FCE concentration</b> | <b>Qualifying / Preselected numbers</b> | <b>Design efficiency</b> |
|----------------------------------|-------------------------------------------------------------------------|--------------------------|-----------------------------------------|--------------------------|
| 3 m                              | 1.3818                                                                  | 7.18 m                   | 4/4                                     | 100%                     |
| 4 m                              | 1.3818                                                                  | 7.18 m                   |                                         |                          |
| 5 m                              | 1.3818                                                                  | 7.18 m                   |                                         |                          |
| 6 m                              | 1.3818                                                                  | 7.18 m                   |                                         |                          |

**Table S4. The ionic conductivities of various aqueous LiCl electrolytes at  $-60\text{ }^{\circ}\text{C}$ .**

| <b>Concentration</b> | <b>Ionic conductivity at <math>-60\text{ }^{\circ}\text{C}</math><br/>(<math>\text{mS cm}^{-1}</math>)</b> |
|----------------------|------------------------------------------------------------------------------------------------------------|
| 5 m                  | 3.44                                                                                                       |
| 6 m                  | 4.27                                                                                                       |
| 6.75 m               | 5.08                                                                                                       |
| 7.18 m               | 6.09                                                                                                       |
| 7.86 m               | 5.87                                                                                                       |
| 8.5 m                | 5.56                                                                                                       |
| 9.26 m               | 5.12                                                                                                       |
| 10 m                 | 4.81                                                                                                       |

**Table S5. The eutectic-point concentration  $X_e$  of H<sub>2</sub>O-NaClO<sub>4</sub> system identified via FCE approach ( $T_t = -34.1$  °C).**

| Preselected concentration | Refractive index of FCE at 25 °C | $X_e$  |
|---------------------------|----------------------------------|--------|
| 4 m                       | 1.3745                           | 9.07 m |
| 5 m                       | 1.3745                           | 9.07 m |
| 6 m                       | 1.3745                           | 9.07 m |

**Table S6. The eutectic-point concentration  $X_e$  for various H<sub>2</sub>O-solute system determined by FCE approach. All the  $T_e$  values of H<sub>2</sub>O-solute systems are determined by DSC tests.**

| System                                             | Targeted temperature ( $T_e$ ) | Refractive index of FCE at 25 °C | $X_e$  |
|----------------------------------------------------|--------------------------------|----------------------------------|--------|
| H <sub>2</sub> O-NaCF <sub>3</sub> SO <sub>3</sub> | -20.5 °C                       | 1.3470                           | 4.54 m |
| H <sub>2</sub> O-KCF <sub>3</sub> SO <sub>3</sub>  | -20.5 °C                       | 1.3530                           | 8.30 m |
| H <sub>2</sub> O-LiBF <sub>4</sub>                 | -28.5 °C                       | 1.3206                           | 4.53 m |
| H <sub>2</sub> O-KCl                               | -12.2 °C                       | 1.3610                           | 3.42 m |
| H <sub>2</sub> O-LiTFSI                            | -42.5 °C                       | 1.3584                           | 5.41 m |
| H <sub>2</sub> O-NaCl                              | -21.1 °C                       | 1.3705                           | 5.11 m |

**Table S7. The anti-freezing electrolyte design using FCE approach when  $T_t$  is set as  $-50\text{ }^\circ\text{C}$  in  $\text{H}_2\text{O}-\text{NaClO}_4-\text{NaCF}_3\text{COO}$  system and the design efficiency in FCE approach.**

| <b>Preselected concentration (NaClO<sub>4</sub> + NaCF<sub>3</sub>COO)</b> | <b>Refractive index of FCE at 25 °C</b> | <b>FCE concentration</b> | <b>Qualifying / Preselected numbers</b> | <b>Design efficiency</b> |
|----------------------------------------------------------------------------|-----------------------------------------|--------------------------|-----------------------------------------|--------------------------|
| 4 m +<br>4 m                                                               | 1.3615                                  | 3.85 m +<br>5.92 m       | 2/2                                     | 100%                     |
| 2 m +<br>6 m                                                               |                                         | 2.51m +<br>7.49 m        |                                         |                          |

**Table S8. The  $T_g$  and  $T_f$  values of aqueous solutions in  $H_2O$ - $NaClO_4$ - $NaCF_3COO$  system based on the DSC data in Figs. S4c-d and the design efficiency in conventional approach.** The “\*” means that the  $T_f$  values of these electrolytes cannot be determined by DSC curves owing to the lack of melting peaks. According to our crystallization acceleration test in Fig. S5, the two electrolytes (9 m + 2 m, 9 m + 3 m) freeze at  $-50$  °C, whereas another two electrolytes (3.85 m + 5.92 m, 2.51 m + 7.49 m) do not freeze at  $-50$  °C.

| Preselected concentration<br>$NaClO_4$ +<br>$NaCF_3COO$ | $T_g$<br>determined<br>by DSC | $T_f$ determined<br>by DSC | Qualifying<br>/Preselected<br>numbers | Design<br>efficiency |
|---------------------------------------------------------|-------------------------------|----------------------------|---------------------------------------|----------------------|
| 1 m +<br>1 m                                            | $-91.4$ °C                    | $-8.1$ °C                  | 2/15                                  | 13.3%                |
| 2 m +<br>1 m                                            | $-93.6$ °C                    | $-12.3$ °C                 |                                       |                      |
| 3 m +<br>3 m                                            | $-88.6$ °C                    | $-24.3$ °C                 |                                       |                      |
| 4 m +<br>2 m                                            | $-85.3$ °C                    | $-25.6$ °C                 |                                       |                      |
| 4 m +<br>4 m                                            | $-100.6$ °C                   | $-34.7$ °C                 |                                       |                      |
| 5 m +<br>3 m                                            | $-104.1$ °C                   | $-32.9$ °C                 |                                       |                      |
| 3 m +<br>5 m                                            | $-97.5$ °C                    | $-36.2$ °C                 |                                       |                      |
| 2 m +<br>6 m                                            | $-108.5$ °C                   | $-30.8$ °C                 |                                       |                      |
| 6 m +<br>3 m                                            | $-104.4$ °C                   | $-37.1$ °C                 |                                       |                      |
| 9 m +<br>2 m*                                           | $-106.2$ °C                   | \                          |                                       |                      |
| 9 m +<br>3 m*                                           | $-101.5$ °C                   | \                          |                                       |                      |
| 7 m +<br>2 m*                                           | $-99.1$ °C                    | $-30.8$ °C                 |                                       |                      |
| 5.5 m +<br>5.5 m                                        | $-101.4$ °C                   | $-36.9$ °C                 |                                       |                      |
| 3.85 m +<br>5.92 m*                                     | $-93.7$ °C                    | \                          |                                       |                      |
| 2.51 m +<br>7.49 m*                                     | $-88.2$ °C                    | \                          |                                       |                      |



**Table S9.** The ionic conductivities of FCEs ( $T_t = -50\text{ }^\circ\text{C}$ ) in  $\text{H}_2\text{O}$ - $\text{NaClO}_4$ - $\text{NaCF}_3\text{COO}$  systems.

| <b>Electrolytes<br/>(<math>\text{NaClO}_4 + \text{NaCF}_3\text{COO}</math>)</b> | <b>Ionic conductivity<br/>at <math>25\text{ }^\circ\text{C}</math> (<math>\text{mS cm}^{-1}</math>)</b> | <b>Ionic conductivity<br/>at <math>-50\text{ }^\circ\text{C}</math><br/>(<math>\text{mS cm}^{-1}</math>)</b> |
|---------------------------------------------------------------------------------|---------------------------------------------------------------------------------------------------------|--------------------------------------------------------------------------------------------------------------|
| 3.85 m + 5.92 m                                                                 | 96.9                                                                                                    | 0.31                                                                                                         |
| 2.51 m + 7.49 m                                                                 | 86.7                                                                                                    | 0.24                                                                                                         |

**Table S10. The coordination species and numbers within cutoff radius of 4 Å based on AIMD results.**

| Liquid structures                                           | Coordination species and numbers (cutoff radius: 4 Å) |                                |                    |                    |                    |                   |
|-------------------------------------------------------------|-------------------------------------------------------|--------------------------------|--------------------|--------------------|--------------------|-------------------|
|                                                             | O <sub>w</sub> -H                                     | O <sub>w</sub> -O <sub>w</sub> | O <sub>w</sub> -Li | O <sub>w</sub> -Cl | O <sub>w</sub> -Na | O <sub>w</sub> -F |
| H <sub>2</sub> O                                            | 19.7                                                  | 7.4                            | \                  | \                  | \                  | \                 |
| 7.18 m LiCl                                                 | 15.9                                                  | 6.6                            | 1.16               | 1.07               | \                  | \                 |
| 9.07 m NaClO <sub>4</sub>                                   | 13.1                                                  | 5.3                            | \                  | 0.88               | 0.58               | \                 |
| 3.85 m NaClO <sub>4</sub> +<br>5.92 m NaCF <sub>3</sub> COO | 12.0                                                  | 4.7                            | \                  | 0.19               | 0.73               | 0.91              |

**Table S11. Compared Li-based FCE to reported electrolytes in terms of ionic conductivity, battery operating low-temperature limit (OLTL), energy density at 25 °C, and lifespan.**

| <b>Systems</b>                                                                                     | <b>Electrolyte</b>                                            | <b>Ionic Conductivity</b>             | <b>OLTL, Energy density, lifespan</b>                  |
|----------------------------------------------------------------------------------------------------|---------------------------------------------------------------|---------------------------------------|--------------------------------------------------------|
| LiMn <sub>2</sub> O <sub>4</sub> //PTCDI<br><b>(This work)</b>                                     | 7.18 m LiCl                                                   | 6.09 mS cm <sup>-1</sup> , –<br>60 °C | –60 °C,<br>80 Wh kg <sup>-1</sup> ,<br>>2000 cycles    |
| LiMn <sub>2</sub> O <sub>4</sub> //Mo <sub>6</sub> S <sub>8</sub><br>(Literature) <sup>18</sup>    | 5 m LiTFSI-CO <sub>2</sub>                                    | ~1.5 mS cm <sup>-1</sup> , –<br>40 °C | –40 °C,<br>~80 Wh kg <sup>-1</sup> ,<br>2000<br>cycles |
| LiMn <sub>2</sub> O <sub>4</sub> //CuSe<br>(Literature) <sup>19</sup>                              | 7.86 m LiCl                                                   | 5.00 mS cm <sup>-1</sup> ,<br>–78 °C, | –78 °C,<br>109 Wh kg <sup>-1</sup> ,<br>100 cycles     |
| LiMn <sub>2</sub> O <sub>4</sub> //LiTi <sub>5</sub> O <sub>12</sub><br>(Literature) <sup>20</sup> | H <sub>2</sub> O-DOL-<br>LiTFSI<br>(BSiS-DOL <sub>0.5</sub> ) | 0.1 mS cm <sup>-1</sup> , –<br>50 °C, | –50 °C,<br>/,<br>100 cycles                            |

**Table S12. Compared Na-based FCE to reported electrolytes in terms of other cation, co-solvent, battery operating low-temperature limit (OLTL), energy density at 25 °C, and lifespan.**

| <b>Systems</b>                                                                                                                       | <b>Electrolyte</b>                                                             | <b>Other cation or Co-solvent</b> | <b>OLTL, Energy density, lifespan</b>               |
|--------------------------------------------------------------------------------------------------------------------------------------|--------------------------------------------------------------------------------|-----------------------------------|-----------------------------------------------------|
| NaCoHCF//PTCDI<br><b>(This work)</b>                                                                                                 | 3.85 m NaClO <sub>4</sub><br>+ 5.92 m<br>NaCF <sub>3</sub> COO                 | No                                | −50 °C,<br>62 Wh kg <sup>−1</sup> ,<br>>1000 cycles |
| Na <sub>3</sub> (VOPO <sub>4</sub> ) <sub>2</sub> F//NaTi <sub>2</sub> (PO <sub>4</sub> ) <sub>3</sub><br>(Literature) <sup>21</sup> | 25 m NaFSI<br>+<br>10 m NaFTFSI                                                | No                                | −10 °C,<br>64 Wh Kg <sup>−1</sup> ,<br>500 cycles   |
| NaCoHCF//AC<br>(Literature) <sup>22</sup>                                                                                            | 1 m NaClO <sub>4</sub><br>+<br>3.86 m CaCl <sub>2</sub>                        | Yes<br>(Ca <sup>2+</sup> )        | −30 °C,<br>28 Wh kg <sup>−1</sup> ,<br>1000 cycles  |
| AC//NaTi <sub>2</sub> (PO <sub>4</sub> ) <sub>3</sub><br>(Literature) <sup>23</sup>                                                  | H <sub>2</sub> O <sub>0.7</sub> DMSO <sub>0.3</sub> -2<br>m NaClO <sub>4</sub> | Yes<br>(DMSO)                     | −50 °C,<br>36 Wh kg <sup>−1</sup> ,<br>100 cycles   |

**Table S13. The anti-freezing electrolyte design using FCE approach when  $T_i$  is set as  $-50\text{ }^\circ\text{C}$  in  $\text{H}_2\text{O}$ -EG- $\text{NaClO}_4$  system.**

| <b>Preselected concentration<br/>(mass ratio)</b> | <b>FCE concentration<br/>(mass ratio)</b> | <b>Prepared electrolyte<br/>concentration</b>              |
|---------------------------------------------------|-------------------------------------------|------------------------------------------------------------|
| H <sub>2</sub> O-EG<br>(60:40)                    | H <sub>2</sub> O-EG<br>(36:64)            | H <sub>36</sub> EG <sub>64</sub> -0.5 m NaClO <sub>4</sub> |

**Table S14. The anti-freezing electrolyte design using FCE approach when  $T_i$  is set as  $-20\text{ }^\circ\text{C}$  in  $\text{LiPF}_6$ -EC-DEC system.**

| <b>Preselected concentration<br/>(mole ratio)</b> | <b>FCE concentration<br/>(mole ratio)</b> |
|---------------------------------------------------|-------------------------------------------|
| $\text{LiPF}_6$ -EC-DEC<br>(1:7.50:4.10)          | $\text{LiPF}_6$ -EC-DMC<br>(1:3.23:6.18)  |

## References:

1. X. Wu, M. Sun, S. Guo, J. Qian, Y. Liu, Y. Cao, X. Ai and H. Yang, *ChemNanoMat.*, 2015, **1**, 188-193.
2. C.-Y. Tan and Y.-X. Huang, *J. Chem. Eng. Data*, 2015, **60**, 2827-2833.
3. D. Butcher, *Instrum. Sci. Technol.*, 2010, **38**, 458-469.
4. R. Michalski, *Crit. Rev. Anal. Chem.*, 2006, **36**, 107-127.
5. A. Buzid, J. Boertjes, E. S. Gilchrist, J. D. Glennon and J. H. T. Luong, *Anal. Methods*, 2023, **15**, 3382-3392.
6. G. Kresse and J. Furthmüller, *Phys. Rev. B*, 1996, **54**, 11169.
7. G. Kresse and J. Furthmüller, *Comput. Mater. Sci.*, 1996, **6**, 15-50.
8. J. P. Perdew, K. Burke and M. Ernzerhof, *Phys. Rev. Lett.*, 1996, **77**, 3865.
9. M. Dion, H. Rydberg, E. Schroder, D. C. Langreth and B. I. Lundqvist, *Phys. Rev. Lett.*, 2004, **92**, 246401.
10. S. Nosé, *J. Chem. Phys.*, 1984, **81**, 511-519.
11. W. G. Hoover, *Phys. Rev. A*, 1985, **31**, 1695.
12. L. Martínez, R. Andrade, E. G. Birgin and J. M. Martínez, *J. Comput. Chem.*, 2009, **30**, 2157-2164.
13. M. Ding, K. Xu and T. Jow, *J. Therm. Anal. Calorim.*, 2000, **62**, 177-186.
14. Q. Wang, L. Zhao, C. Li and Z. Cao, *Sci. Rep.*, 2016, **6**, 26831.
15. L. Jiang, L. Liu, J. Yue, Q. Zhang, A. Zhou, O. Borodin, L. Suo, H. Li, L. Chen, K. Xu and Y. S. Hu, *Adv. Mater.*, 2020, **32**, 1904427.
16. V. V. Shcherbakov, *Russ. J. Electrochem.*, 2009, **45**, 1292-1295.
17. C. Monnin, M. Dubois, N. Papaiconomou and J.-P. Simonin, *J. Chem. Eng. Data*, 2002, **47**, 1331-1336.
18. J. Yue, J. Zhang, Y. Tong, M. Chen, L. Liu, L. Jiang, T. Lv, Y. S. Hu, H. Li, X. Huang, L. Gu, G. Feng, K. Xu, L. Suo and L. Chen, *Nat. Chem.*, 2021, **13**, 1061-1069.
19. L. Tang, Y. Xu, W. Zhang, Y. Sui, A. Scida, S. R. Tachibana, M. Garaga, S. K. Sandstrom, N. C. Chiu, K. C. Stylianou, S. G. Greenbaum, P. A. Greaney, C. Fang and X. Ji, *Angew. Chem. Int. Ed.*, 2023, **62**, e202307212.
20. Z. Ma, J. Chen, J. Vatamanu, O. Borodin, D. Bedrov, X. Zhou, W. Zhang, W. Li, K. Xu and L. Xing, *Energy Storage Mater.*, 2022, **45**, 903-910.
21. D. Reber, R.-S. Kühnel and C. Battaglia, *ACS Mater. Lett.*, 2019, **1**, 44-51.

22. K. Zhu, Z. Li, Z. Sun, P. Liu, T. Jin, X. Chen, H. Li, W. Lu and L. Jiao, *Small*, 2022, **18**, 2107662.
23. Q. Nian, J. Wang, S. Liu, T. Sun, S. Zheng, Y. Zhang, Z. Tao and J. Chen, *Angew. Chem. Int. Ed.*, 2019, **58**, 16994-16999.
